# Supplementary material for: Construction of LncRNA-Related ceRNA Networks in Longissimus Dorsi Muscle of Jinfen White Pigs at Different Developmental Stages
Source: MDPI journal article supplement (doi:10.3390/cimb46010022), 2024-01-02
Supplement: s1 [file s1]

Table S1 Primers of RT-qPCR.

| mRNAs, miRNAs, lncRNAs | Primer sequence (5' -3')                                 | Product Length |
|------------------------|----------------------------------------------------------|----------------|
| <i>CAPZB</i>           | F: TGACCCGGATGTTCACTCCT<br>R: TCAAGTCCAAGGCACAGTCC       | 145 bp         |
| <i>NOS1</i>            | F: GGGGATAGTCCCCACTAGCA<br>R: TGGCATGATTCCTGCGACT        | 187 bp         |
| <i>PTPRM</i>           | F: TGCTGTTGAAAAGGGAGGGG<br>R: CACCTCGCTGTGACACTTCT       | 71 bp          |
| <i>NRF1</i>            | F: GAAGCTGTCCAGGGGCTTTA<br>R: ATCCATGCTCTGCTACTGGG       | 116 bp         |
| <i>ENAH</i>            | F: CCCCTCCCCAGCTTTTCTTT<br>R: ACAAGTGTCCACCTCCTCCT       | 118 bp         |
| <i>Sh3bgr</i>          | F: ATTCTCTGCCTCCCCAGAT<br>R: TTCCTCGGGCGATTTTGTC         | 147 bp         |
| ssc-miR-127            | F: GGGTCGGATCCGTCTGAGC<br>R: CAGTGCGTGTCGTGGAGT          | 67 bp          |
| ssc-miR-133a-3p        | F: GGGTTGGTCCCCTTCAAC<br>R: CAGTGCGTGTCGTGGAGT           | 62 bp          |
| ssc-miR-486            | F: GGGTCCTGTACTGAGCTGC<br>R: CAGTGCGTGTCGTGGAGT          | 61 bp          |
| XLOC_016846            | F: GCTTGGAGGGACATGACACA<br>R: TGTCGTTTGAGGGTTCTGGG       | 184 bp         |
| XLOC_016847            | F: CATGTTTGCAGGCGTGTTCA<br>R: GGCAAGCAAAGTGGACAGTG       | 135 bp         |
| XLOC_022984            | F: CATTAGTGAGGACTTGGGGCT<br>R: GGTTACTGTTCTTGTTTAACACTCC | 70 bp          |
| 18s RNA                | F: ATGCCAGAGTCTCGTTCGTTAT<br>R: CGGACAGGATTGACAGATTGAT   | 119 bp         |
| U6                     | F: CTCGCTTCGGCAGCACA<br>R: AACGCTTCACGAATTGCGT           | 60 bp          |
